# Supplementary material
Source: ML conference proceedings conference paper supplement (https://proceedings.mlr.press/v37/hana15.html)
Supplement: Supplementary file 1 [file hana15-supp.pdf]

---

## Supplementary Material: Large-scale Log-determinant Computation through Stochastic Chebyshev Expansions

---

### A. Proof of Corollary 3

For given  $\varepsilon < \frac{2}{\log(\sigma_{\max}^2)}$ , set  $\varepsilon_0 = \frac{\varepsilon}{2} \log\left(\frac{1}{\sigma_{\max}^2}\right)$ . Since all eigenvalues of  $C^T C$  are positive and less than 1, it follows that

$$|\log \det(C^T C)| = \left| \sum_{i=1}^d \log \lambda_i \right| \geq d \log\left(\frac{1}{\sigma_{\max}^2}\right)$$

where  $\lambda_i$  are  $i$ -th eigenvalues of  $C^T C$ . Thus,

$$\varepsilon_0 = \frac{\varepsilon}{2} \log\left(\frac{1}{\sigma_{\max}^2}\right) \leq \frac{\varepsilon}{2} \frac{|\log \det C^T C|}{d} = \varepsilon \frac{|\log(|\det C|)|}{d}$$

We use  $\varepsilon_0$  instead of  $\varepsilon$  from Theorem 2, then following

$$\Pr [ |\log(|\det C|) - \Gamma| \leq \varepsilon |\log(|\det C|)| ] \geq 1 - \zeta$$

holds if  $m$  and  $n$  satisfies below condition.

### B. Proof of Corollary 4

Similar to proof of Corollary 3, set  $\varepsilon_0 = \frac{\varepsilon}{2} \log \sigma_{\min}^2$ . Since eigenvalues of  $C^T C$  are greater than 1,

$$|\log \det(C^T C)| \geq d \log \sigma_{\min}^2$$

and  $\varepsilon_0 \leq \varepsilon \frac{|\log(|\det C|)|}{d}$ . From Theorem 2, we substitute  $\varepsilon_0$  into  $\varepsilon$  and

$$\Pr [ |\log \det C - \Gamma| \leq \varepsilon |\log \det C| ] \geq 1 - \zeta$$

holds if  $m$  and  $n$  satisfies below condition.

### C. Proof of Corollary 5

For  $\varepsilon_0 = \varepsilon(\Delta_{\text{avg}} - 1)/2, \zeta \in (0, 1)$ , Theorem 2 provides the following inequality:

$$\Pr (|\log \det L(i^*) - \Gamma| \leq \varepsilon_0(|V| - 1)) \geq 1 - \zeta.$$

Observe that since vertex  $i^*$  is connected all other vertices, the number of spanning tree, i.e.,  $\det L(i^*)$ , is greater than  $2^{(|V|-1)(\Delta_{\text{avg}}-1)/2}$ . Hence, we have

$$\begin{aligned} \Pr (|\log \det L(i^*) - \Gamma| \leq \varepsilon_0(|V| - 1)) \\ \leq \Pr (|\log \det L(i^*) - \Gamma| \leq \varepsilon \log \det L(i^*)). \end{aligned}$$

This completes the proof of Corollary 5.
